# Supplementary material for: Mid-Atlantic US observations of radiocarbon in CO 2 : fossil and biogenic source partitioning and model evaluation
Source: Copernicus journal article supplement (doi:10.5194/acp-25-10479-2025), 2025-09-15
Supplement: Supplementary file 1 [file acp-25-10479-2025-supplement.pdf]

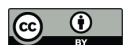

*Supplement of*

## **Mid-Atlantic US observations of radiocarbon in CO<sub>2</sub>: fossil and biogenic source partitioning and model evaluation**

**Bianca C. Baier et al.**

*Correspondence to:* Bianca C. Baier ([bianca.baier@noaa.gov](mailto:bianca.baier@noaa.gov))

The copyright of individual parts of the supplement might differ from the article licence.

Table S1. Pair-wise seasonal regression slopes during each ACT campaign between  $\text{CO}_{2\text{tot}}$  and  $\text{CO}_{2\text{ff}}$  and  $\text{CO}_{2\text{bio}}$ , and between  $\text{CO}_{2\text{bio}}$  and OCS ABL-FT differences ( $\text{OCS}_{\text{xs}}$ ). Regression slopes were derived using a Model II linear least squares geometric mean regression. Slope uncertainties and coefficient of determination ( $R^2$ ) are reported for each ACT seasonal campaign, along with the fraction of total samples,  $F(\text{[ ]})$ , with negative derived  $\text{CO}_{2\text{bio}}$  and  $\text{CO}_{2\text{tot}}$ .

|                                                   | Winter<br>(slope $\pm 1\sigma$ , $R^2_{(p<0.05)}$ ) | Spring<br>(slope $\pm 1\sigma$ , $R^2_{(p<0.05)}$ ) | Summer<br>(slope $\pm 1\sigma$ , $R^2_{(p<0.05)}$ ) | Fall<br>(slope $\pm 1\sigma$ , $R^2_{(p<0.05)}$ ) |
|---------------------------------------------------|-----------------------------------------------------|-----------------------------------------------------|-----------------------------------------------------|---------------------------------------------------|
| $\text{CO}_{2\text{tot}}:\text{CO}_{2\text{ff}}$  | $0.81\pm 0.10$ , 0.20                               | $0.45\pm 0.06$ , 0.18                               | $0.26\pm 0.04$ , 0.18                               | $0.38\pm 0.05$ , 0.26                             |
| $\text{CO}_{2\text{tot}}:\text{CO}_{2\text{bio}}$ | $0.86\pm 0.10$ , 0.31                               | $0.88\pm 0.05$ , 0.73                               | $0.92\pm 0.04$ , 0.93                               | $0.81\pm 0.05$ , 0.92                             |
| $\text{CO}_{2\text{bio}}:\text{OCS}$              | $-0.09\pm 0.14$ , 0.20                              | $0.13\pm 0.02$ , --                                 | $0.12\pm 0.02$ , 0.11                               | $-0.25\pm 0.05$ , --                              |
|                                                   | Winter<br>(Fraction)                                | Spring<br>(Fraction)                                | Summer<br>(Fraction)                                | Fall<br>(Fraction)                                |
| $F(\text{CO}_{2\text{bio}}<0)$                    | 0.09                                                | 0.57                                                | 0.82                                                | 0.08                                              |
| $F(\text{CO}_{2\text{tot}}<0)$                    | 0.00                                                | 0.28                                                | 0.62                                                | 0.04                                              |

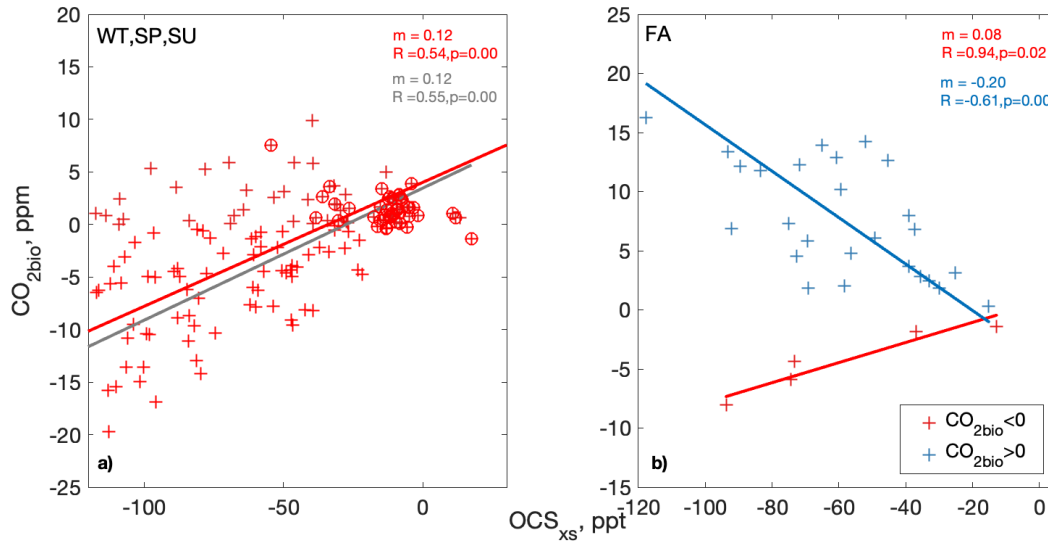

Figure S1. Correlations of  $\text{CO}_{2\text{bio}}$  and OCS ABL-FT differences ( $\text{OCS}_{\text{xs}}$ ) during seasonal ACT campaigns shown in a) for winter (WT, circled), spring (SP) and summer (SU) seasons (red crosses). The correlation for data points in a) where  $\text{CO}_{2\text{bio}}$  indicates uptake only ( $\text{CO}_{2\text{bio}} < 0$ ) is shown in grey, providing a similar  $R$  value. Slopes for  $\text{CO}_{2\text{bio}}:\text{OCS}_{\text{xs}}$  for each season are shown separately in Table S1. b) Fall (FA) deployment correlations with OCS distinguished between when  $\text{CO}_{2\text{bio}}$  indicated biogenic respiration ( $\text{CO}_{2\text{bio}} > 0$ ) and uptake ( $\text{CO}_{2\text{bio}} < 0$ ).
